# Supplementary material
Source: MDPI journal article supplement (https://www.mdpi.com/2075-4701/14/5/595)
Supplement: s1 [file s1 › metals-2963907-supplementary.pdf]

# Supporting Information

## **Heterostructure engineering enables MoSe<sub>2</sub> with superior Li/Na-ion storage**

*Huabin Kong,<sup>#\*</sup> Yihan Wen, Siyin Chen, Xiyao Chen, Runzhi Chen, Jiamou Yan, Nianjie Mao*

Department of Materials Science and Engineering, Huaqiao University, Xiamen, 361021, China

<sup>#</sup> These authors contributed equally to this work

### **Corresponding Authors**

<sup>\*</sup> Huabin Kong, E-mail: konghuabin@hqu.edu.cn

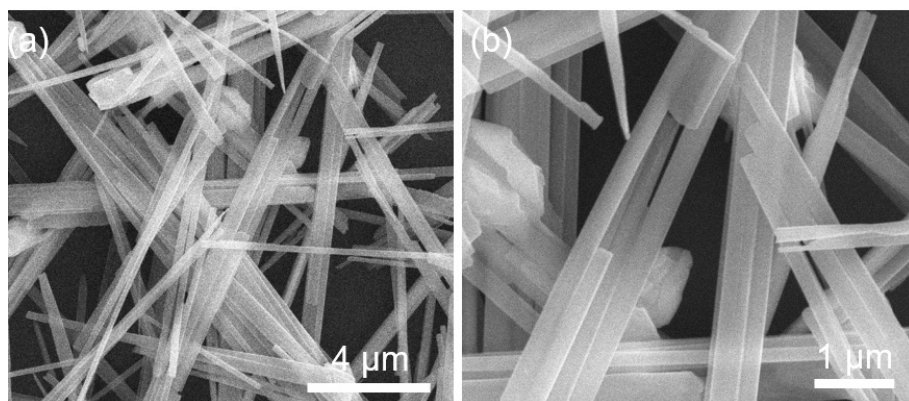

**Figure S1.** The SEM images of MoSe<sub>2</sub>.

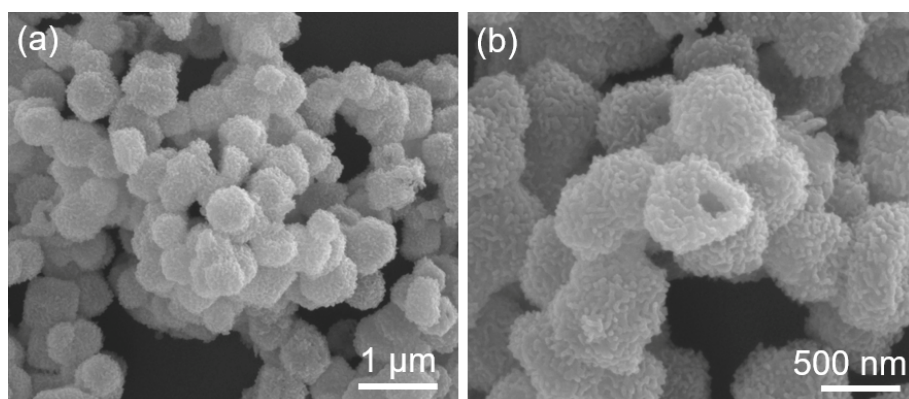

**Figure S2.** The SEM images of CoSe<sub>2</sub>/NC.

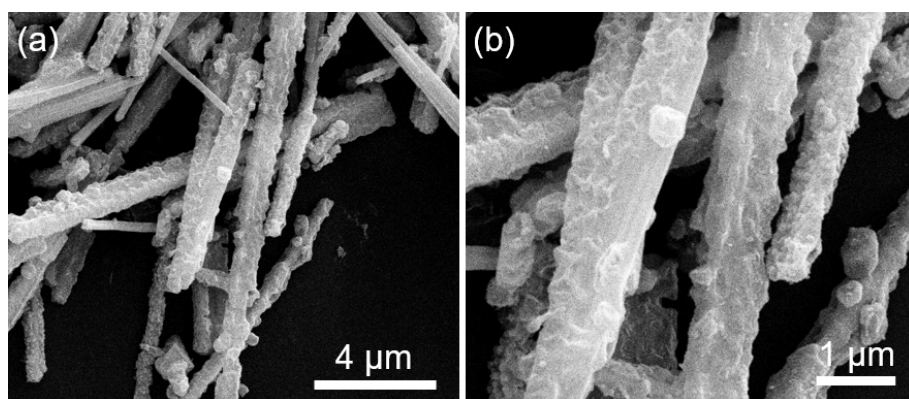

**Figure S3.** The SEM images of MoSe<sub>2</sub>/CoSe<sub>2</sub>/NC.

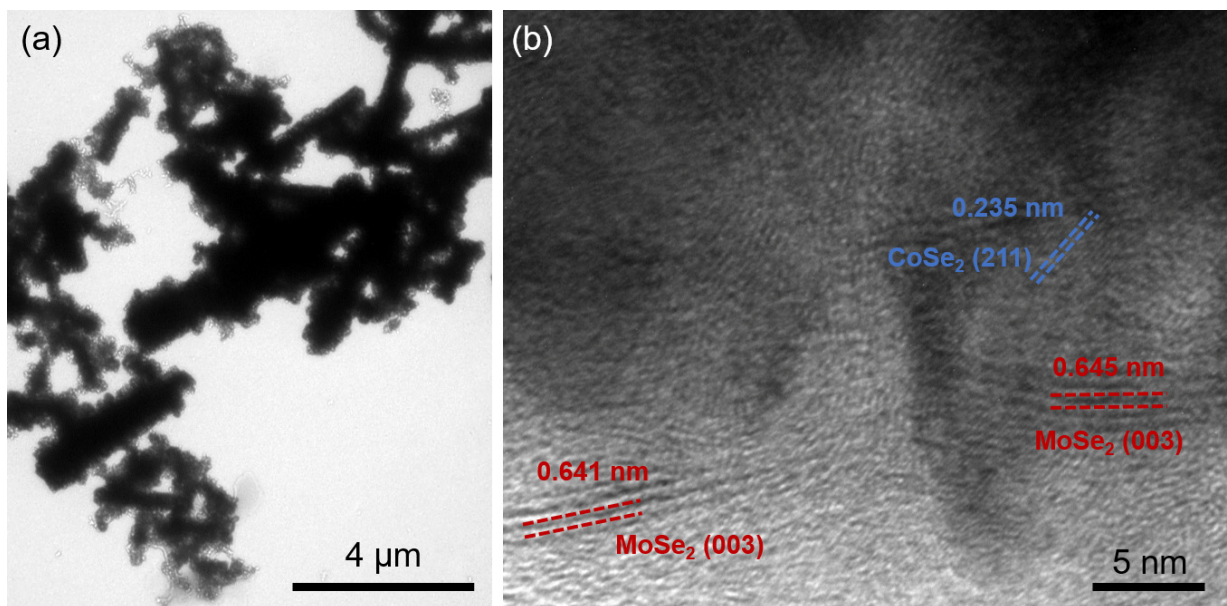

**Figure S4.** The TEM and HRTEM images of MoSe<sub>2</sub>/CoSe<sub>2</sub>/NCNFs.

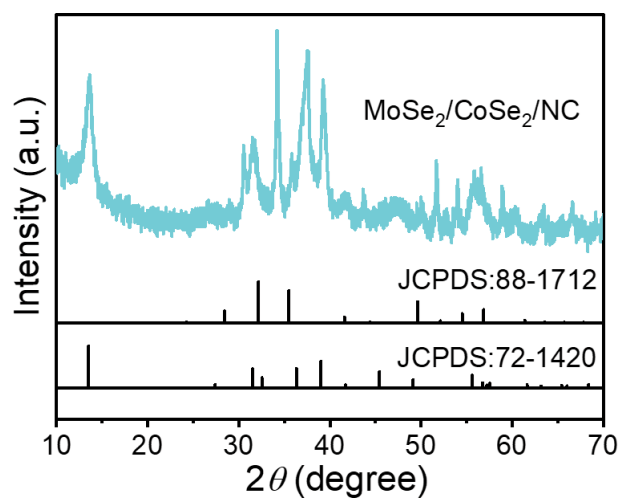

**Figure S5.** The XRD pattern of MoSe<sub>2</sub>/CoSe<sub>2</sub>/NC.

### Calculation process of each substance content in the MoSe<sub>2</sub>/CoSe<sub>2</sub>/NCNTs

In the thermogravimetric measurement, the chemical reactions occurred as follows:

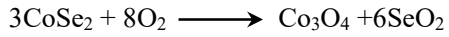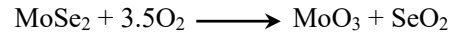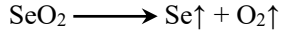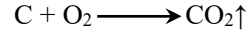

Therefore, the final product after testing (29.77%) is Co<sub>3</sub>O<sub>4</sub> and MoO<sub>3</sub>. The increase of mass (25.38%) during measurement is mainly due to the inclusion of oxygen atoms. And the loss of mass (93.23%) during measurement is mainly due to the disappearance of carbon and SeO<sub>2</sub>.

Set the mole number of Co<sub>3</sub>O<sub>4</sub> as  $a$  and the mole number of MoO<sub>3</sub> as  $b$ . Therefore, the following two equations can be listed:

$$241a + 144b = 36.1 \%$$

$$256a + 112b = 32.0\%$$

$$a = 0.058\%$$

$$b = 0.155\%$$

$$\text{The mass percent of CoSe}_2 = 217 \times 3 \times 0.058\% = 38\%$$

$$\text{The mass percent of MoSe}_2 = 254 \times 0.155\% = 40\%$$

$$\text{The mass percent of NC} = 100\% - 38\% - 40\% = 22 \%$$

So the contents of MoSe<sub>2</sub>, CoSe<sub>2</sub> and NCNTs are 40%, 38% and 22% in the MoSe<sub>2</sub>/CoSe<sub>2</sub>/NCNTs, respectively.

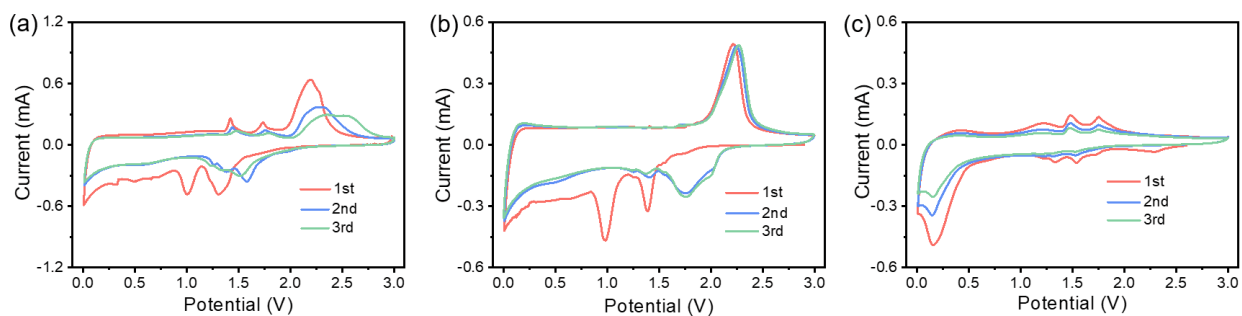

**Figure S6.** The CV curves of samples at a scan rate of  $0.5 \text{ mV s}^{-1}$  in LIBs: (a)  $\text{MoSe}_2/\text{CoSe}_2/\text{NC}$ , (b)  $\text{CoSe}_2/\text{NC}$ , (c)  $\text{MoSe}_2$ .

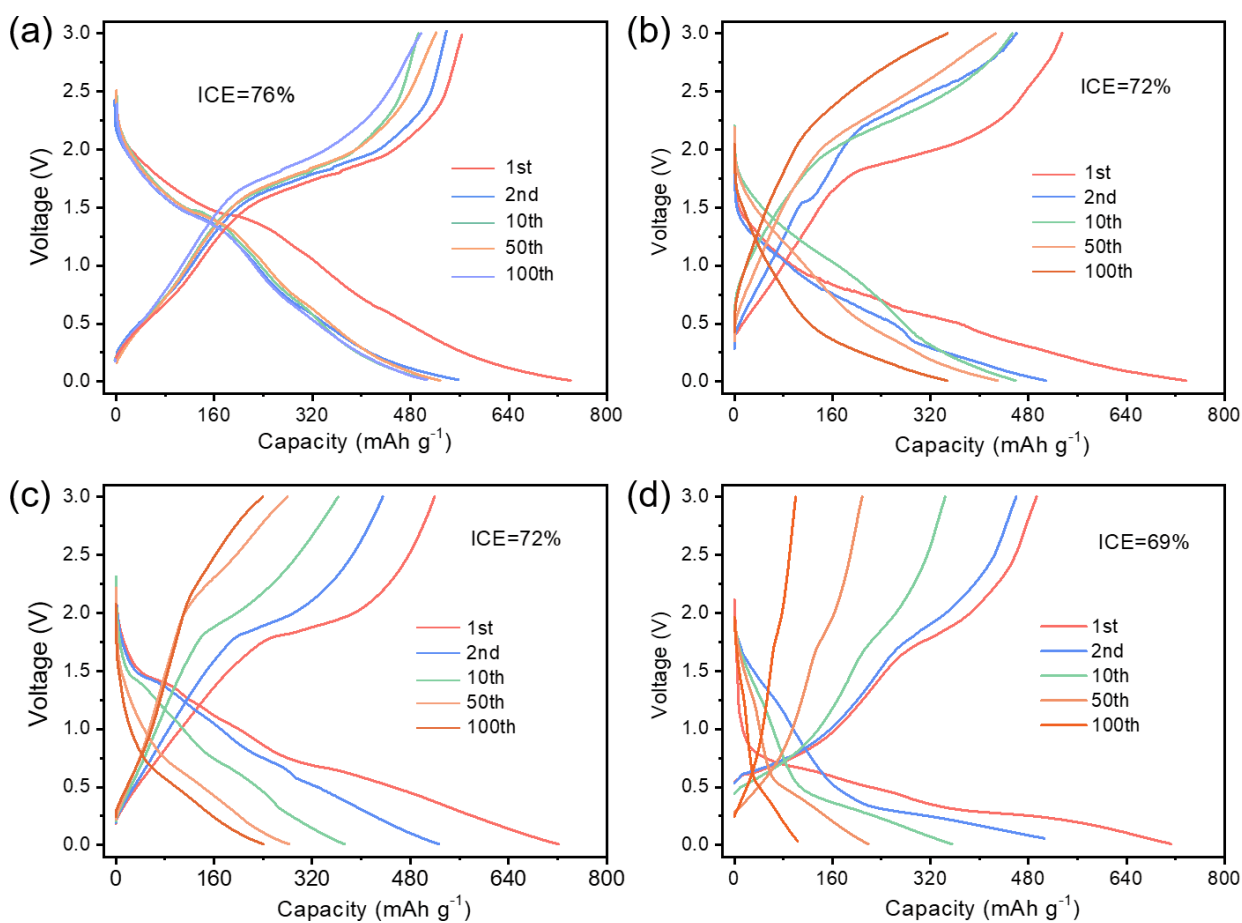

**Figure S7.** The charge/discharge profiles of samples at a current density of  $0.2 \text{ A g}^{-1}$  in LIBs: (a)  $\text{MoSe}_2/\text{CoSe}_2/\text{NCNFs}$ , (b)  $\text{MoSe}_2/\text{CoSe}_2/\text{NC}$ , (c)  $\text{CoSe}_2/\text{NC}$ , (d)  $\text{MoSe}_2$ .

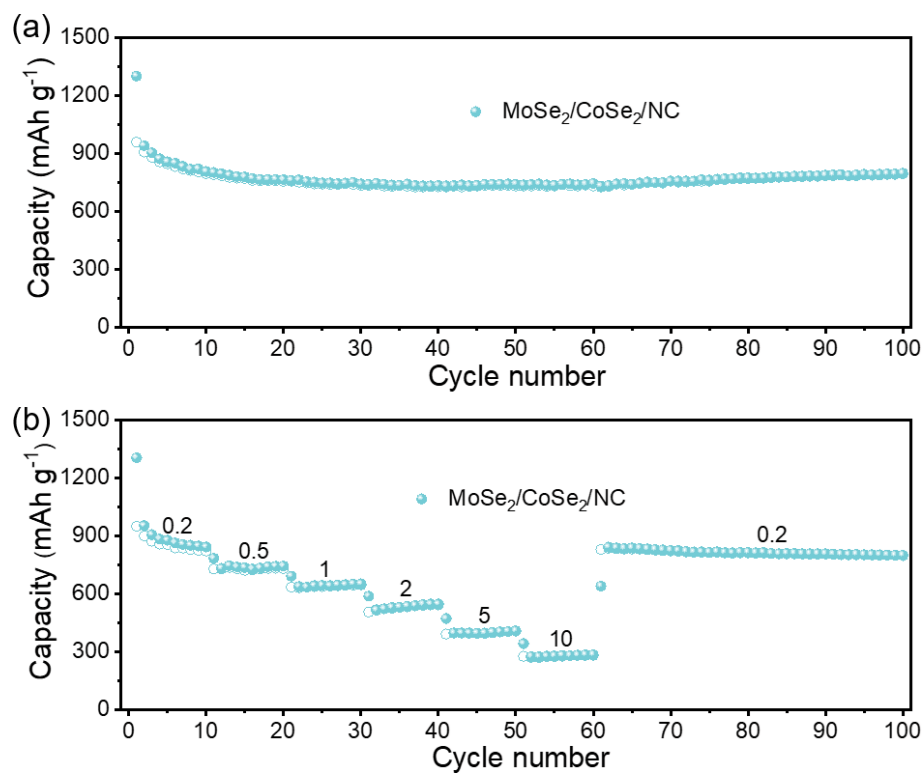

**Figure S8.** Electrochemical performances of MoSe<sub>2</sub>/CoSe<sub>2</sub>/NC in LIBs: (a) Cycling performances at 0.2 A g<sup>-1</sup>, (b) Rate performances at 0.2-10 A g<sup>-1</sup>.

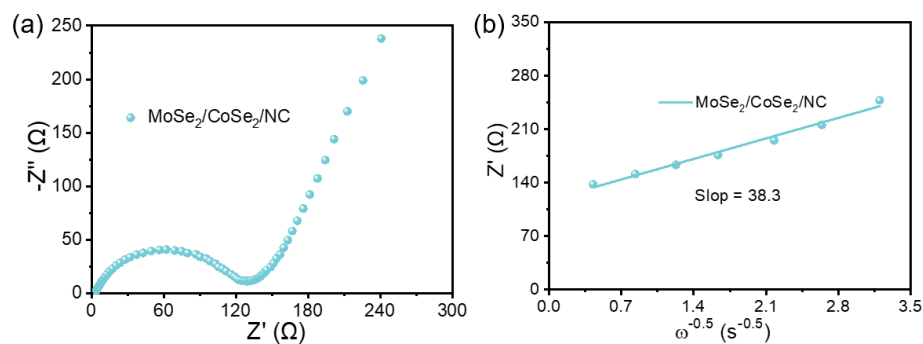

**Figure S9.** (a) Nyquist plots of MoSe<sub>2</sub>/CoSe<sub>2</sub>/NC after 100 cycles in LIBs and (b) The relationship between  $Z''$  and  $\omega^{-1/2}$ .

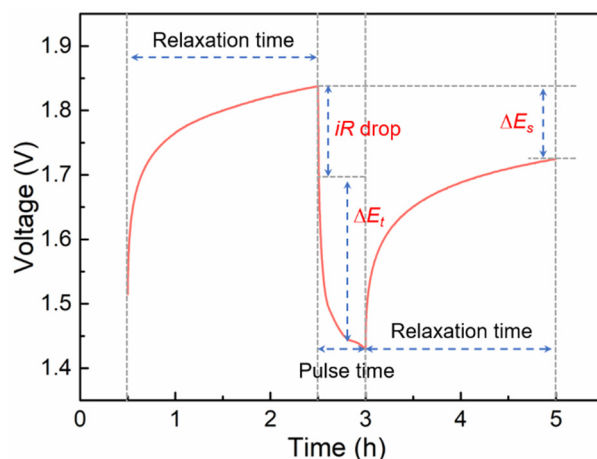

**Figure S10.** E vs. t curves of the MoSe<sub>2</sub>/CoSe<sub>2</sub>/NC for a single GITT during discharge process.

The lithium diffusion coefficient was measured by using Galvanostatic intermittent titration technique (GITT) and calculated based on equation as follows.

$$D = \frac{4L^2}{\pi\tau} \left( \frac{\Delta E_s}{\Delta E_t} \right)^2$$

Where  $L$  is lithium ion diffusion length (unit : cm); for compact electrode, it is equal to average thickness of pole piece measured,  $\tau$  is the relaxation time (unit : s), and  $\Delta E_s$  is the steady-state potential (unit : V) by the current pulse.  $\Delta E_t$  is the potential change (unit : V) during the constant current pulse after eliminating the  $iR$  drop.

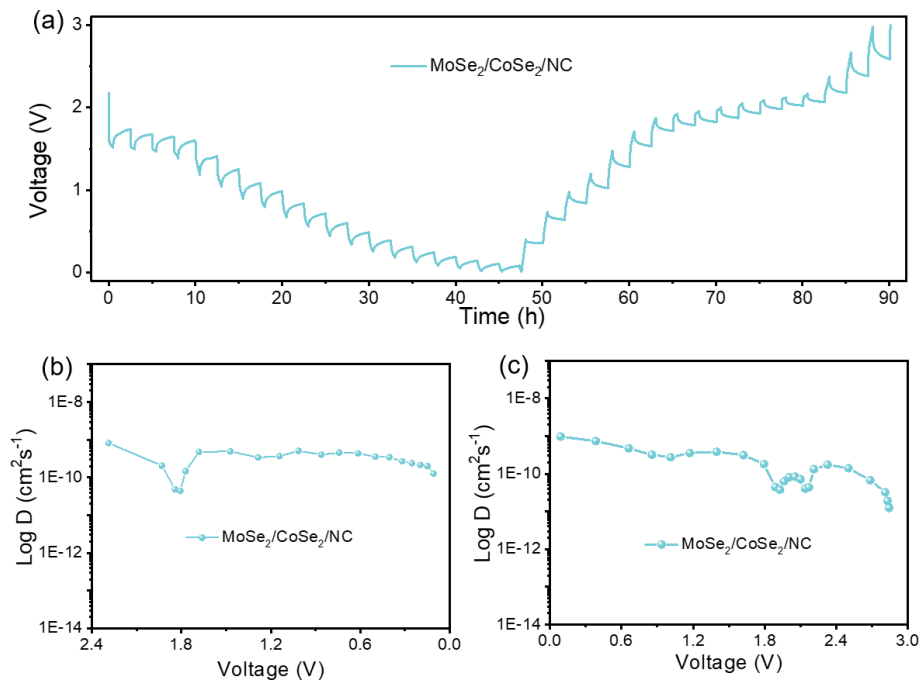

**Figure S11.** Electrochemical performances of MoSe<sub>2</sub>/CoSe<sub>2</sub>/NC in LIBs: (a) GITT curves at 5th discharge and charge process, (b, c) the corresponding Li<sup>+</sup> diffusion coefficient at 5th discharge and charge process.

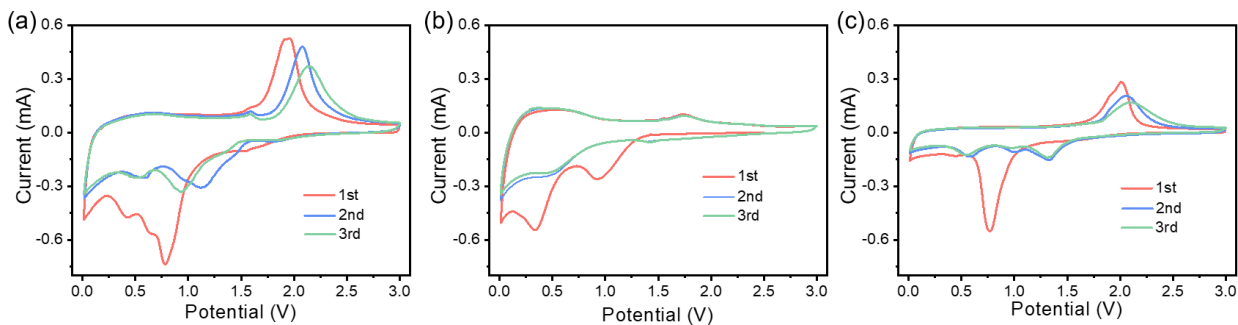

**Figure S12.** The CV curves of samples at a scan rate of 0.5 mV s<sup>-1</sup> in SIBs: (a) MoSe<sub>2</sub>/CoSe<sub>2</sub>/NC, (b) CoSe<sub>2</sub>/NC, (c) MoSe<sub>2</sub>.

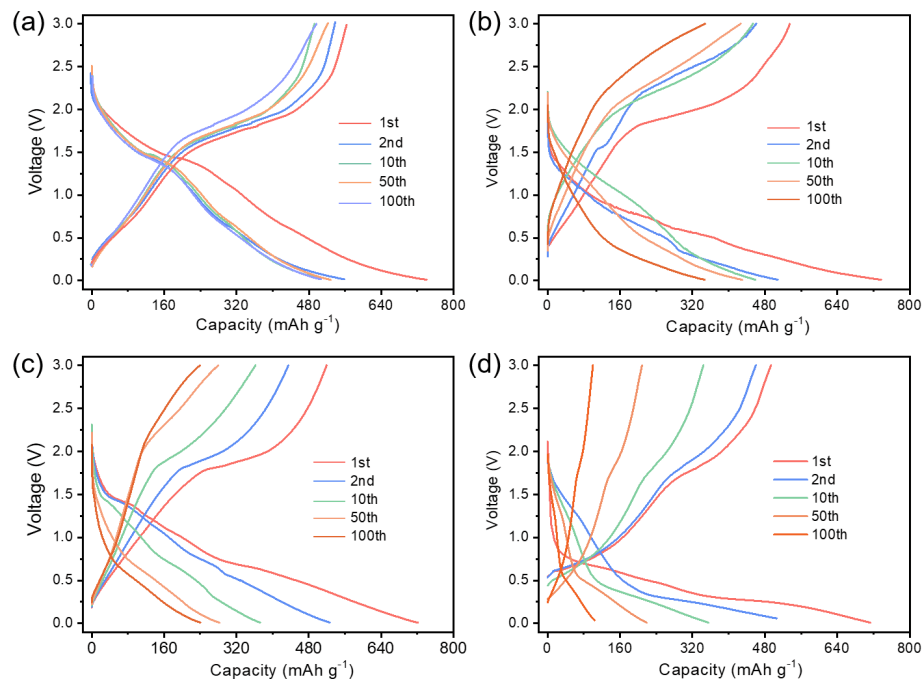

**Figure S13.** The charge/discharge profiles of samples at a current density of  $0.2 \text{ A g}^{-1}$  in SIBs: (a)  $\text{MoSe}_2/\text{CoSe}_2/\text{NCNFs}$ , (b)  $\text{MoSe}_2/\text{CoSe}_2/\text{NC}$ , (c)  $\text{CoSe}_2/\text{NC}$ , (d)  $\text{MoSe}_2$

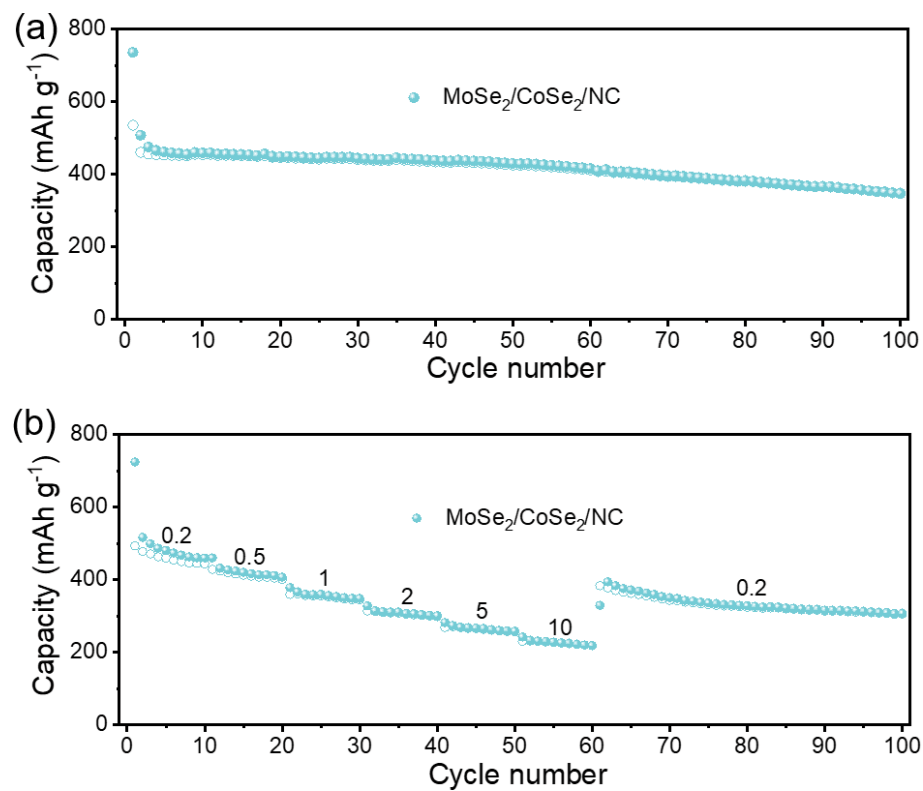

**Figure S14.** Electrochemical performances of  $\text{MoSe}_2/\text{CoSe}_2/\text{NC}$  in SIBs: (a) Cycling performances at  $0.2 \text{ A g}^{-1}$ , (b) Rate performances at  $0.2\text{-}10 \text{ A g}^{-1}$ .

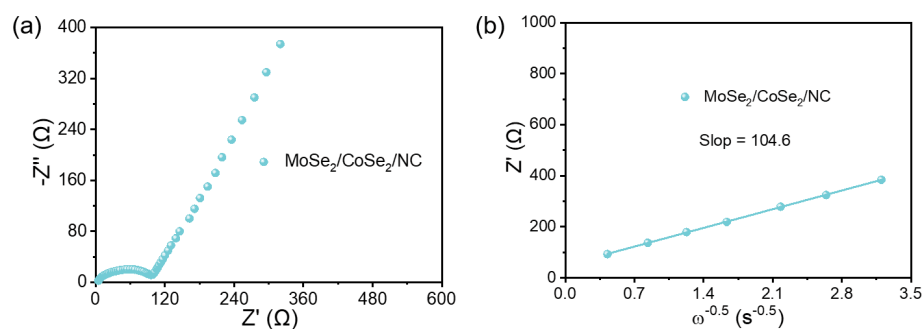

**Figure S15.** (a) Nyquist plots of MoSe<sub>2</sub>/CoSe<sub>2</sub>/NC after 100 cycles in SIBs and (b) The relationship between  $Z_{re}$  and  $\omega^{-1/2}$ .

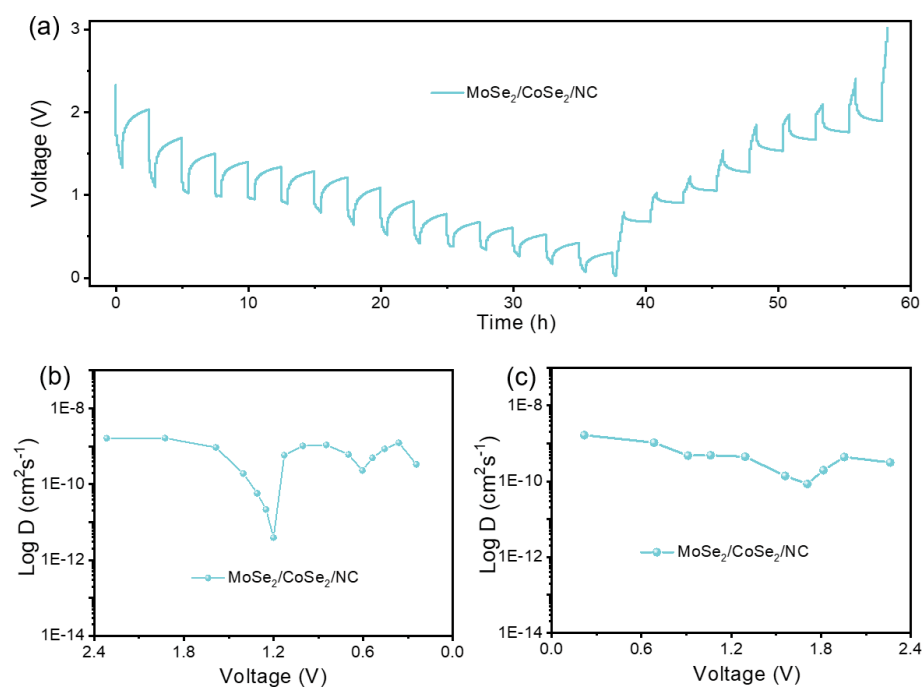

**Figure S16.** Electrochemical performances of MoSe<sub>2</sub>/CoSe<sub>2</sub>/NC in SIBs: (a) GITT curves at 5th discharge and charge process, (b, c) the corresponding Li<sup>+</sup> diffusion coefficient at 5th discharge and charge process.

**Table S1.** Comparison of electrochemical performance in LIBs between MoSe<sub>2</sub>/CoSe<sub>2</sub>/NC and previously reported literature.

| LIB anode material                                     | Rate performance<br>(mAh g <sup>-1</sup> ) | Cycling performance<br>(mAh g <sup>-1</sup> )      | Published year |
|--------------------------------------------------------|--------------------------------------------|----------------------------------------------------|----------------|
| <b>This work</b>                                       | <b>452 at 10 A g<sup>-1</sup></b>          | <b>553 after 2000 cycles at 5 A g<sup>-1</sup></b> |                |
| MoSe <sub>2</sub> @NC SNCs <sup>[1]</sup>              | 124 at 16 A g <sup>-1</sup>                | 501 after 320 cycles at 2 A g <sup>-1</sup>        | 2021           |
| MoSe <sub>2</sub> @N-C <sup>[2]</sup>                  | 300 at 10 A g <sup>-1</sup>                | 360 after 500 cycles at 5 A g <sup>-1</sup>        | 2020           |
| MoSe <sub>2</sub> nanoparticles <sup>[3]</sup>         | 423 at 5 A g <sup>-1</sup>                 | 573 after 200 cycles at 0.2 A g <sup>-1</sup>      | 2022           |
| Mo-MoSe <sub>2</sub> <sup>[4]</sup>                    | 380 at 10 C                                | 550 after 50 cycles at 0.2 C                       | 2020           |
| NHMCFs/MoSe <sub>2</sub> <sup>[5]</sup>                | 244 at 10 A g <sup>-1</sup>                | 582 after 400 cycles at 1 A g <sup>-1</sup>        | 2021           |
| MoO <sub>2</sub> @MoSe <sub>2</sub> @NC <sup>[6]</sup> | 311 at 5 A g <sup>-1</sup>                 | 468 after 80 cycles at 0.5 A g <sup>-1</sup>       | 2021           |
| MoSe <sub>2</sub> /MoC/N-C <sup>[7]</sup>              | 575 at 4 A g <sup>-1</sup>                 | 535 after 5000 cycles at 2 A g <sup>-1</sup>       | 2020           |
| MoSe <sub>2</sub> @NCNFs <sup>[8]</sup>                | 250 at 2 A g <sup>-1</sup>                 | 180 after 500 cycles at 2 A g <sup>-1</sup>        | 2024           |
| Ag/MoSe <sub>2</sub> <sup>[9]</sup>                    | 325 at 2 A g <sup>-1</sup>                 | 497 after 500 cycles at 0.5 A g <sup>-1</sup>      | 2021           |
| MoSe <sub>2</sub> /NFC <sup>[10]</sup>                 | 298 at 5 A g <sup>-1</sup>                 | 306 after 500 cycles at 2 A g <sup>-1</sup>        | 2020           |
| MWSe <sup>[11]</sup>                                   | 438 at 5 A g <sup>-1</sup>                 | 1007 after 500 cycles at 0.5 A g <sup>-1</sup>     | 2023           |
| MoSe <sub>2</sub> @rGO&CNT <sup>[12]</sup>             | 126 at 1.2 A g <sup>-1</sup>               | 376 after 50 cycles at 0.06 A g <sup>-1</sup>      | 2022           |

**Table S2.** Comparison of electrochemical performance in SIBs between MoSe<sub>2</sub>/CoSe<sub>2</sub>/NC and previously reported literature.

| SIB anode material                                        | Rate performance<br>(mAh g <sup>-1</sup> ) | Cycling performance<br>(mAh g <sup>-1</sup> )      | Published<br>year |
|-----------------------------------------------------------|--------------------------------------------|----------------------------------------------------|-------------------|
| <b>This work</b>                                          | <b>296 at 10 A g<sup>-1</sup></b>          | <b>310 after 2000 cycles at 5 A g<sup>-1</sup></b> |                   |
| MoSe <sub>2</sub> /SnSe <sub>2</sub> @C <sup>[13]</sup>   | 350 at 1.6 A g <sup>-1</sup>               | 324 after 200 cycles at 0.5 A g <sup>-1</sup>      | 2023              |
| MoSe <sub>2</sub> /N-PCD <sup>[14]</sup>                  | 266 at 2 A g <sup>-1</sup>                 | 270 after 1000 cycles at 2 A g <sup>-1</sup>       | 2020              |
| MoSe <sub>2</sub> nanoplatelets <sup>[15]</sup>           | 196 at 10 A g <sup>-1</sup>                | 270 after 2500 cycles at 2 A g <sup>-1</sup>       | 2020              |
| MoSe <sub>2</sub> /MXene <sup>[16]</sup>                  | 250 at 10 A g <sup>-1</sup>                | 380 after 400 cycles at 2 A g <sup>-1</sup>        | 2020              |
| MoSe <sub>2</sub> @rGO <sup>[17]</sup>                    | 251 at 5 A g <sup>-1</sup>                 | 225 after 100 cycles at 0.5 A g <sup>-1</sup>      | 2021              |
| CoSe <sub>2</sub> -MoSe <sub>2</sub> /rGO <sup>[18]</sup> | 393 at 5 A g <sup>-1</sup>                 | 326 after 500 cycles at 2 A g <sup>-1</sup>        | 2022              |
| P-1T-MoSe <sub>2</sub> <sup>[19]</sup>                    | 275 at 10 A g <sup>-1</sup>                | 328 after 1000 cycles at 5 A g <sup>-1</sup>       | 2022              |
| P-MoSe <sub>2</sub> /N-CNT <sup>[22]</sup>                | 169 at 10 A g <sup>-1</sup>                | 372 after 300 cycles at 0.2 A g <sup>-1</sup>      | 2021              |
| NC@MoSe <sub>2</sub> @rGO <sup>[21]</sup>                 | 200 at 2 A g <sup>-1</sup>                 | 186 after 100 cycles at 1 A g <sup>-1</sup>        | 2021              |
| PEG-C@MoSe <sub>2</sub> @CNT <sup>[22]</sup>              | 392 at 3 A g <sup>-1</sup>                 | 212 after 3000 cycles at 2 A g <sup>-1</sup>       | 2023              |
| C@MoSe <sub>2</sub> @NMWCNT <sup>[23]</sup>               | 126 at 10 A g <sup>-1</sup>                | 168 after 3600 cycles at 2 A g <sup>-1</sup>       | 2023              |
| MoSe <sub>2</sub> ⊂CNB <sup>[24]</sup>                    | 124 at 10 A g <sup>-1</sup>                | 140 after 7500 cycles at 10 A g <sup>-1</sup>      | 2021              |

## Reference

- [1] Liu, Y; Cao, J; Cai, J; Chen, M; Wang, L; Huang, X; Liao, S; Min, Y. Flower-like MoSe<sub>2</sub>@N-doped carbon sub-nanoclusters regulated by MoO<sub>3</sub> hexagonal prism as advanced anode for lithium-ion battery. *J. Alloys Compd.* **2021**, 865, 158276.
- [2] Zhang, K; Jiang, X; Zeng, M; Jing, B. Hydrothermal synthesis of three-dimensional hydrangea-like MoSe<sub>2</sub>@N-doped carbon anode material for high performance lithium ion batteries. *J. Electroanal. Chem.* **2020**, 879, 114818.
- [3] Li, N; Zhou, Q; Lin, J; Lu, Y; Hou, Z; Qian, Y. One-pot synthesis of uniform MoSe<sub>2</sub> nanoparticles as high performance anode materials for lithium/sodium ion batteries. *J. Alloy Compd.* **2022**, 922, 166306.
- [4] Wu, Y; Liu, W. Few-layered MoSe<sub>2</sub> ultrathin nanosheets as anode materials for lithium ion batteries. *J. Alloys Compd.* **2020**, 813, 152074.
- [5] Ni, X; Cui, Z; Luo, H; Chen, H; Liu, C; Wu, Q; Ju, A. Hollow multi-nanochannel carbon nanofibers@MoSe<sub>2</sub> nanosheets composite as flexible anodes for high performance lithium-ion batteries. *Chem. Eng. J.* **2021**, 404, 126249.
- [6] Qin, Z; Liu, X; Huang, Z; Sun, R; Li, Z; Fan, H; Lu, S. Electrochemical and pseudocapacitive analysis of rod-like MoO<sub>2</sub>@MoSe<sub>2</sub>@NC heterostructures for high-performance lithium ion batteries. *Acta Metall. Sin. (Engl. Lett.)* **2021**, 34, 425–434.
- [7] Chen, J; Luo, Y; Zhang, W; Qiao, Y; Cao, X; Xie, X; Zhou, H; Pan, A; Liang, S. Tuning interface bridging between MoSe<sub>2</sub> and three-dimensional carbon framework by incorporation of MoC intermediate to boost lithium storage capability. *Nano-Micro Lett.* **2020**, 12, 171.
- [8] Cu, Q; Shang, C; Zhou, G; Wang, X. Freestanding MoSe<sub>2</sub> nanoflowers for superior Li/Na storage properties. *Tungsten.* **2024**, 6, 238-247.
- [9] Ni, X.; Cui, Z.; Luo, H.; Chen, H.; Liu, C.; Wu, Q.; Ju, A. Hollow multi-nanochannel carbon nanofibers@MoSe<sub>2</sub> nanosheets composite as flexible anodes for high performance lithium-ion batteries. *Chem. Eng. J.* **2021**, 404, 126249.
- [10] Wang, S.; Si, Y.; Wan, P.; Zhu, S.; Chu, W.; Yu, Z. MoSe<sub>2</sub> nanoflowers grown on 3D carbon network as an advanced anode for lithium ion batteries. *Mater. Lett.* **2022**, 310, 131487.
- [11] Wang, K.; Zhou, Y.; Cheng, L.; Li, D.; Hu, Z.; Chen, S.; Wu, C.; Song, L.; Ge, B. Engineering phase transition from 2H to 1T in MoSe<sub>2</sub> by W cluster doping toward lithium-ion battery. *Inorg. Chem.* **2023**, 62, 21257-21264.

- [12] Li, J.; Sun, L.; Li, H.; Zhang, Y.; Yang, Y.; Luo, Y.; Qin, Y.; Wang, J. MoSe<sub>2</sub> nanosheets anchored on carbon nanofibers as advanced anodes for lithium-ion batteries. *Electrochim. Acta.* **2023**, 426, 140743.
- [13] Wang, W.; Hu, L.; Li, L.; Liu, C.; Liu, X.; Wang, H.; Zhai, G. Constructing a rapid ion and electron migration channels in MoSe<sub>2</sub>/SnSe<sub>2</sub>@C 2D heterostructures for high-efficiency sodium-ion half/full batteries. *Electrochim. Acta* **2023**, 449, 142239.
- [14] Xie, X.; Huang, K.; Wu, X.; Wu, N.; Xu, Y.; Zhang, S.; Zhang, C. Binding hierarchical MoSe<sub>2</sub> on MOF-derived N-doped carbon dodecahedron for fast and durable sodium-ion storage. *Carbon* **2020**, 169, 1-8.
- [15] Zhao, X.; Zhao, Y.; Huang, B.; Cai, W.; Sui, J.; Yang, Z.; Wang, H.-E. MoSe<sub>2</sub> nanoplatelets with enriched active edge sites for superior sodium-ion storage and enhanced alkaline hydrogen evolution activity. *Chem. Eng. J.* **2020**, 382, 123047.
- [16] Xu, E.; Zhang, Y.; Wang, H.; Zhu, Z.; Quan, J.; Chang, Y.; Li, P.; Yu, D.; Jiang, Y. Ultrafast kinetics net electrode assembled via MoSe<sub>2</sub>/MXene heterojunction for high-performance sodium-ion batteries. *Chem. Eng. J.* **2019**, 382, 123839.
- [17] Chong, S.; Wei, X.; Wu, Y.; Sun, L.; Shu, C.; Lu, Q.; Hu, Y.; Cao, G.; Huang, W. Expanded MoSe<sub>2</sub> nanosheets vertically bonded on reduced graphene oxide for sodium and potassium-ion storage. *ACS Appl. Mater. Interfaces* **2021**, 13, 13158-13169.
- [18] Xu, Y.; Liu, X.; Su, H.; Jiang, S.; Zhang, J.; Li, D. Hierarchical bimetallic selenides CoSe<sub>2</sub>-MoSe<sub>2</sub>/rGO for sodium/potassium-ion batteries anode: insights into the intercalation and conversion mechanism. *Energy Environ. Mater.* **2022**, 5, 627-636.
- [19] He, H.; Zhang, H.; Huang, D.; Kuang, W.; Li, X.; Hao, J.; Guo, Z.; Zhang, C. Harnessing plasma-assisted doping engineering to stabilize metallic phase MoSe<sub>2</sub> for fast and durable sodium-ion storage. *Adv. Mater.* **2022**, 34, 2200397.
- [20] Seon, Y.; Kang, Y.; Cho, J. One-dimensional porous nanostructure composed of few-layered MoSe<sub>2</sub> nanosheets and highly densified-entangled-N-doped CNTs as anodes for Na ion batteries. *Chem. Eng. J.* **2021**, 425, 129051.
- [21] Yang, Y.; Wang, F.; Chen, Y.; Chen, C.; Zhang, S.; Yu, Z.; Au, C.; Yin, S.; Qiu, R. Building a PEG-C@MoSe<sub>2</sub>@CNT heterostructure via in-situ selenidation as highly reversible anodes for Na<sup>+</sup> batteries. *Sci. China Chem.* **2023**, 66, 475-491.

- [22] Chen, S; Shi, Y; Ma, L; Li, N; Wang, Z; Wu, M. Selenide-based anodes for advanced sodium-ion batteries. *Energy Environ. Sci.* **2023**, 16, 1074–1096.
- [23] Yang, Y; Wang, F; Bian, M; Chen, Y; Zhang, S; Yu, Z; Au, C; Yin, S; Qiu, R. Design and synthesis of C@MoSe<sub>2</sub>@NMWCNT heterostructure as anode material for Na<sup>+</sup> Batteries via Mo-Based organic complexes. *Electrochimica Acta* **2023**, 461, 142598.
- [24] Xu, J; Wu, D; Hao, J; Shen, J; Liu, Q; Zhang, P; Jiang, F. Advanced cathode materials for sodium-ion batteries. *Adv. Mater.* **2023**, 35, 2203087.
